# Supplementary material for: Rare Variable M. tuberculosis Antigens induce predominant Th17 responses in human infection
Source: PubMed Central journal article supplement — bioRxiv. 2024 Mar 6:2024.03.05.583634. Preprint. [Version 1] doi: 10.1101/2024.03.05.583634 (PMC10942433; doi:10.1101/2024.03.05.583634), 2024-03-06
Supplement: NIHPP2024.03.05.583634v1-supplement-1.pdf [file NIHPP2024.03.05.583634v1-supplement-1.pdf]

## Supplementary figure 1:

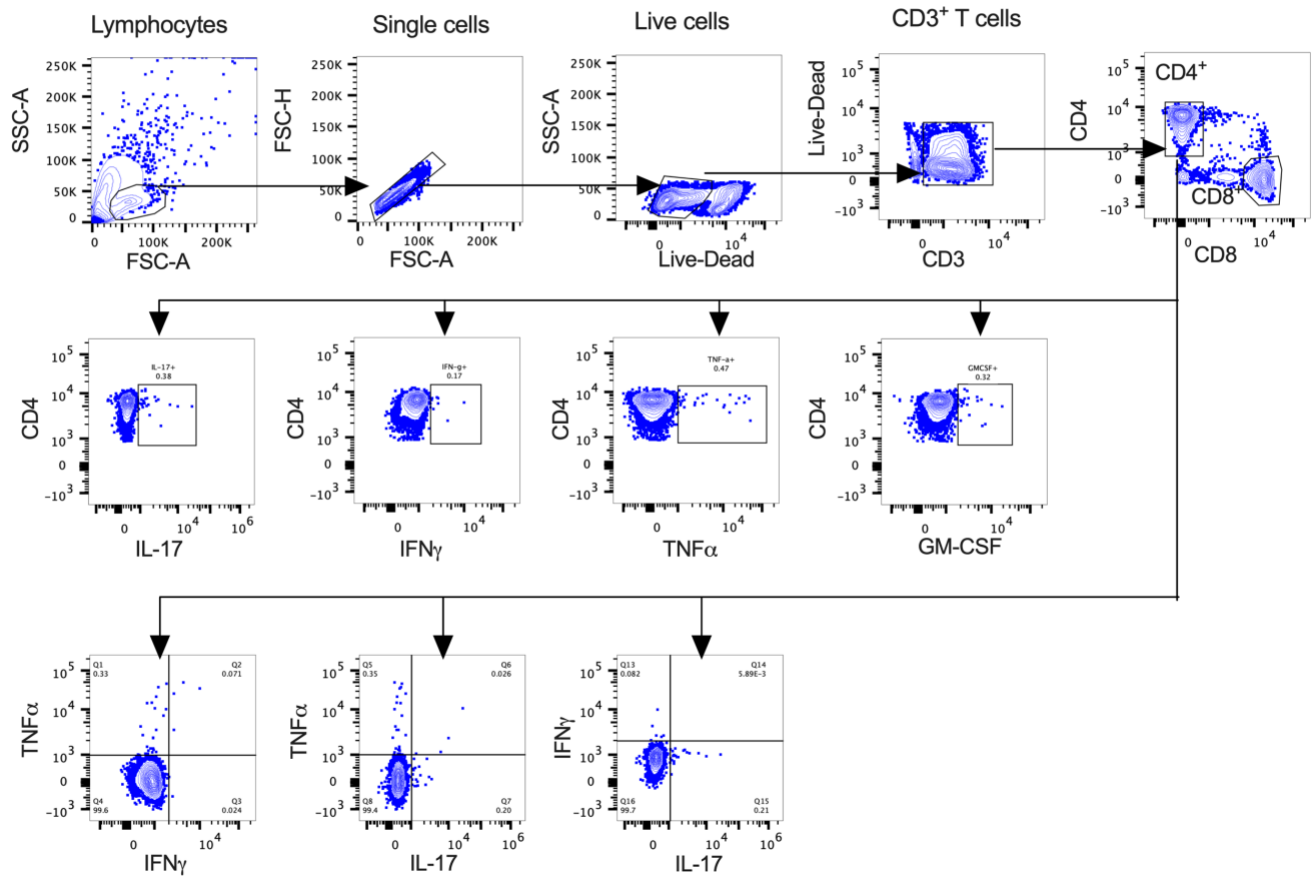

## Supplementary figure 2:

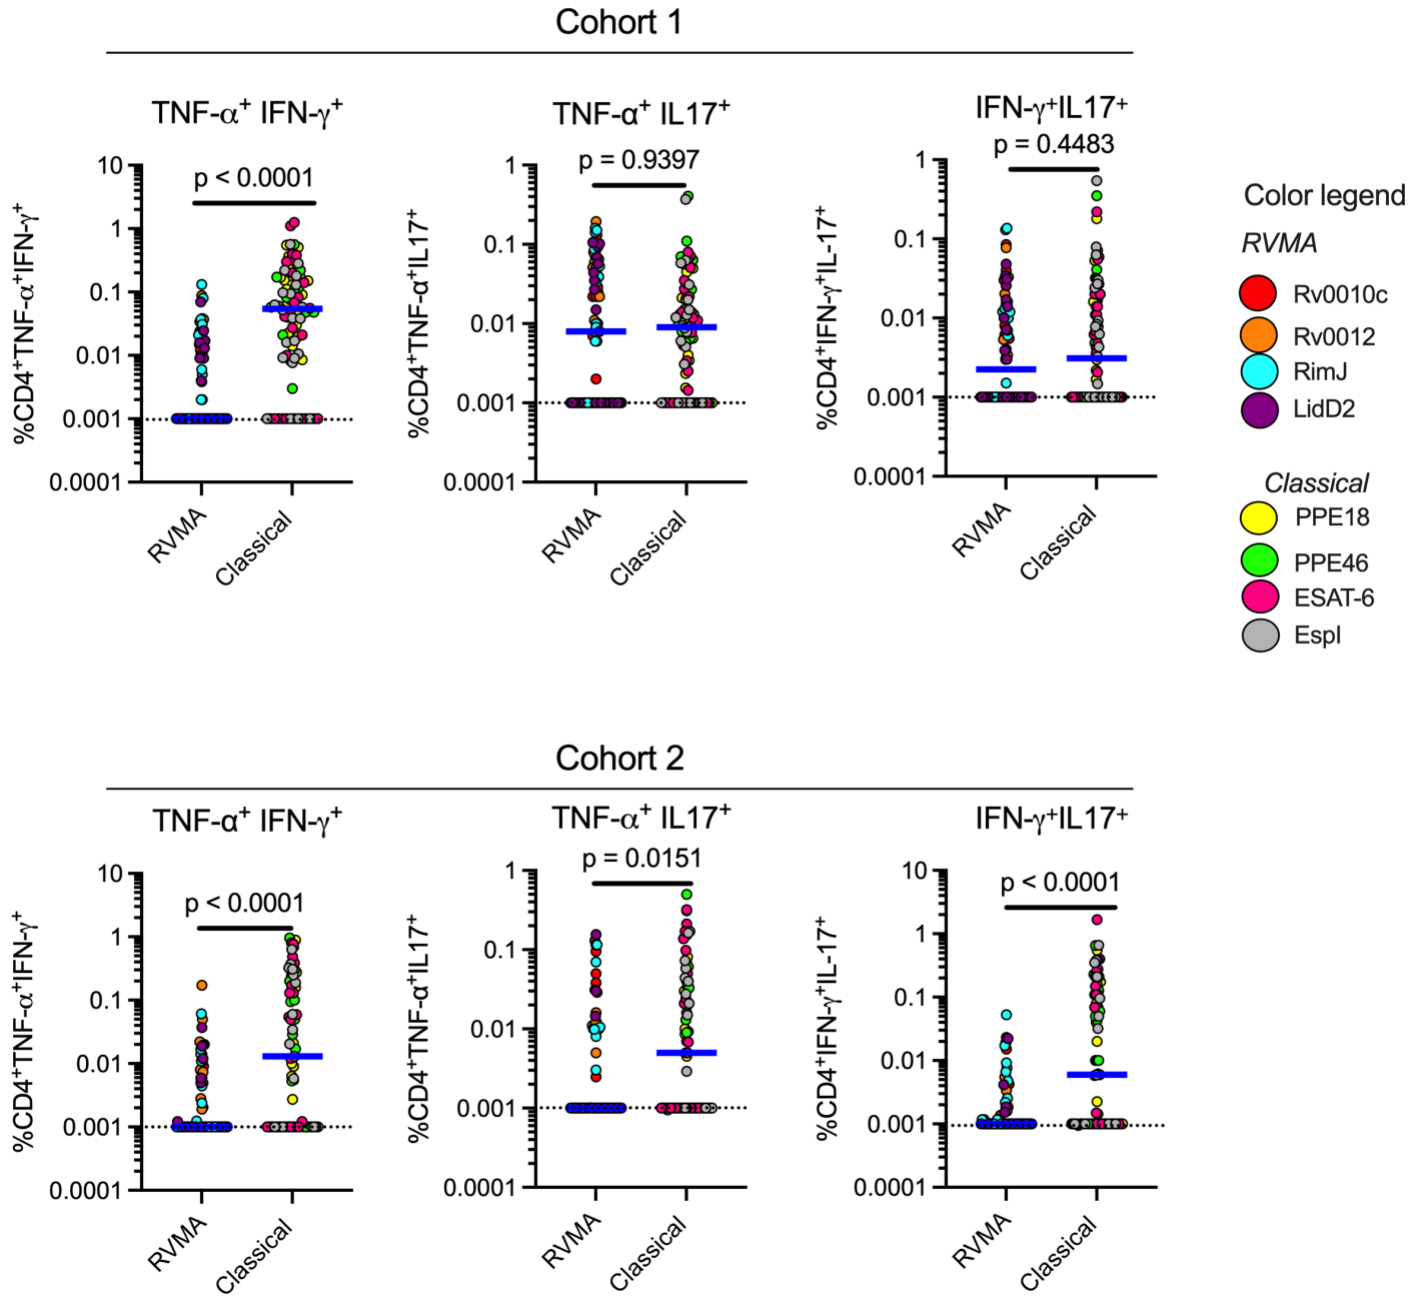

Supplemental Table 1. Demographic and clinical characteristics of study cohorts

| Characteristic                                   | Cohort 1             | Cohort 2           | p*                                     |
|--------------------------------------------------|----------------------|--------------------|----------------------------------------|
| Age, Median (Interquartile range), Y             | 31.5 (20, 49.5)      | 32.9 (26.7, 38.6)  | 0.6613                                 |
| Sex, n (%)                                       |                      |                    |                                        |
| Male                                             | 15 (42%)             | 24 (56%)           | p = 0.2611,<br>Fisher's exact<br>test) |
| Female                                           | 21 (58%)             | 19 (44%)           |                                        |
| BMI; Median (Interquartile range)                | 21.95 (20.18, 26.58) | 21.80 (19.8, 24.7) | 0.8852                                 |
| HbA1c, %; Median (Interquartile range)           | 5.5 (5.2, 5.7)       | 5.3 (5, 6.1)       | 0.7467                                 |
| QFT Results, IU/mL; Median (Interquartile range) |                      |                    |                                        |
| TB antigen minus Nil                             | 9.03 (1.95, 10)      | 5.56 (2.2, 8.23)   | <b>0.0183</b>                          |
| Mitogen minus Nil                                | 5.19 (2.09, 9.46)    | 8.78 (7.75, 9.72)  | <b>0.0011</b>                          |

\*p = Absolute p, Mann-Whitney unless otherwise specified.

Supplemental Table 2. Cohort 2: Frequencies of CD4 T cell cytokine responses, by individual antigens

|              | RVMA            |                |              |               | Classical     |               |                |              |
|--------------|-----------------|----------------|--------------|---------------|---------------|---------------|----------------|--------------|
|              | Rv0010c<br>n=17 | Rv0012<br>n=24 | RimJ<br>n=29 | LldD2<br>n=13 | PPE18<br>n=21 | PPE46<br>n=17 | ESAT-6<br>n=21 | EspI<br>n=14 |
| TNF          | 29              | 58             | 52           | 15            | 52            | 71            | 86             | 86           |
| IFN $\gamma$ | 35              | 58             | 55           | 38            | 71            | 82            | 86             | 93           |
| IL-17        | 59              | 58             | 62           | 54            | 67            | 88            | 86             | 86           |
| GM-CSF       | 59              | 79             | 45           | 62            | 57            | 82            | 71             | 79           |

The values shown reflect the percent of participants whose samples yielded detectable responses, defined as >0.001% of CD4 T cells after stimulation with the indicated antigens.

Supplemental Table 3. Cohort 2: Frequencies of responders: individual cytokines vs antigen class

|              | Median % (interquartile range) n = 4 antigens per category |             | Absolute p (Mann-Whitney) |
|--------------|------------------------------------------------------------|-------------|---------------------------|
|              | RVMA                                                       | Classical   |                           |
| TNF          | 40 (19, 56)                                                | 78 (57, 85) | 0.0571                    |
| IFN $\gamma$ | 51 (38, 57)                                                | 84 (74, 90) | 0.0286                    |
| IL-17        | 58 (54, 61)                                                | 85 (71, 87) | 0.0286                    |
| GM-CSF       | 60 (48, 75)                                                | 74 (61, 78) | 0.6857                    |

Supplemental Table 4. Cohort 2: Magnitudes of individual cytokine responses (% of CD4 T cells) vs antigen class

|              | Median % (interquartile range) n = 4 antigens per category |                    | Absolute p (Mann-Whitney) |
|--------------|------------------------------------------------------------|--------------------|---------------------------|
|              | RVMA                                                       | Classical          |                           |
| TNF          | 0.001 (0.001, 0.12)                                        | 0.35 (0.001, 0.8)  | <0.0001                   |
| IFN $\gamma$ | 0.001 (0.001, 0.06)                                        | 0.3(0.05, 0.72)    | <0.0001                   |
| IL-17        | 0.04 (0.001, 0.24)                                         | 0.29 (0.09, 0.66)  | <0.0001                   |
| GM-CSF       | 0.03 (0.001, 0.22)                                         | 0.13 (0.001, 0.32) | 0.0662                    |

Values shown for each cytokine and each antigen are median % of all CD4 T cells that express the specified cytokine. For statistical analyses, assays that yielded undetectable levels of the stated cytokine were assigned a value of 0.001%.

Supplemental Table 5. Cohort 2: IL-17 vs IFN $\gamma$  responses to individual RVMA

|         | Response Frequencies (% of participants with detectable cytokine <sup>+</sup> CD4 T cells) |              | Response Magnitudes (% of CD4 T cells that are cytokine <sup>+</sup> ) Median (interquartile range) |                       | p*     |
|---------|--------------------------------------------------------------------------------------------|--------------|-----------------------------------------------------------------------------------------------------|-----------------------|--------|
|         | IL-17                                                                                      | IFN $\gamma$ | IL-17                                                                                               | IFN $\gamma$          |        |
| Rv0010c | 58                                                                                         | 35           | 0.02 (0.001, 0.115)                                                                                 | 0.001 (0.001, 0.047)  | 0.2437 |
| Rv0012  | 58                                                                                         | 58           | 0.07 (0.001, 0.385)                                                                                 | 0.012 (0.001, 0.0775) | 0.0054 |
| RimJ    | 62                                                                                         | 55           | 0.06 (0.001, 0.32)                                                                                  | 0.01 (0.001, 0.087)   | 0.2157 |
| LldD2   | 63                                                                                         | 46           | 0.03 (0.001, 0.255)                                                                                 | 0.001 (0.001,0.0305)  | 0.0391 |

\*p values for the comparison of IL-17 vs IFN $\gamma$  magnitudes (Wilcoxon matched pairs)
